# Supplementary material for: The formation of bicyclo[n.2.0]alkan-1-ols from the reaction of the lithium enolates of simple ketones and phenyl vinyl sulfoxideElectronic supplementary information (ESI) available: full experimental details. See http://www.rsc.org/suppdata/ob/b2/b208365e/
Source: Royal Society of Chemistry journal article supplement (doi:10.1039/b208365e), 2003-03-18
Supplement: b208365e.doc [file b208365e.doc]

Supplementary Material for Organic & Biomolecular Chemistry

This journal is © The Royal Society of Chemistry 2003

# Supplementary data

#

# Electronic Supplementary Information for:

The formation of bicyclo[n.2.0]alkan-1-ols from the reaction of the lithium enolates of simple ketones and phenyl vinyl sulfoxide

Wendy A. Loughlin,*and Michelle A. McCleary

School of Science, Griffith University, Brisbane, QLD, 4111, Australia.

Reaction of Cyclobutanone

Method A (45 min, laboratory light, 0.155M)

Cyclobutanone (0.53 ml, 7.134 mmole), lithium diisopropyl amine (1.4 M, 5.1 ml, 7.134 mmole) and phenyl vinyl sulfoxide (0.95 ml, 7.134 mmole) in THF (39.5ml), were reacted together using method A. Upon workup, the crude sulfoxide mixture (1.408 g, 6.334 mmole) in chloroform (20 ml), was treated with MCPBA (6.334 mmole) in chloroform (30 ml). Upon workup, the crude sulfone mixture containing minor amounts of *m*-chlorobenzoic acid was obtained as a yellow oil (0.877 g). Analysis of the crude mixture by 1H NMR indicated cyclohexanone **4** (5.5%) and monoalkylated cyclobutanone **5** (38.5%) were present. The crude mixture was purified by silica column chromatography (hexane: ethyl acetate, 60:40). The first fraction (64 mg) was cyclohexanone **4**. The second fraction (693 mg) was monoalkylated cyclobutanone **5**. Analytically pure samples of cyclohexanone **4** and monoalkylated cyclobutanone **5** were obtained by semi-preparative HPLC from fraction one (hexane: ethyl acetate, 70:30), and fraction two (hexane: ethyl acetate, 50:50) respectively.

Method B (5 min, dark, 0.155M)

Cyclobutanone (0.53 ml, 7.134 mmole), lithium diisopropyl amine (1.4 M, 5.1 ml, 7.134 mmole) and phenyl vinyl sulfoxide (0.95 ml, 7.134 mmole) in THF (39.5ml), were reacted together using method B. Upon workup, the crude sulfoxide mixture (1.365 g, 6.141 mmole) in chloroform (20 ml), was treated with MCPBA (6.141 mmole) in chloroform (30 ml). Upon workup, the crude sulfone mixture containing minor amounts of *m*-chlorobenzoic acid was obtained as a yellow oil (0.503 g). Analysis of the crude mixture by 1H NMR indicated cyclohexanone **4** (6%) and monoalkylated cyclobutanone **5** (18%) were present.

Reaction of Cyclopentanone

Method A (45 min, laboratory light, 0.155M)

Cyclopentanone (0.55 ml, 6.220 mmole), lithium diisopropyl amine (1.95 M, 3.2 ml, 6.220 mmole) and phenyl vinyl sulfoxide (0.83 ml, 6.220 mmole) in THF (35.5 ml), were reacted together using method A. Upon workup, the crude sulfoxide mixture (1.365 g, 5.775 mmole) in chloroform (20 ml), was treated with MCPBA (5.775 mmole) in chloroform (30 ml). Upon workup, the crude sulfone mixture containing minor amounts of *m*-chlorobenzoic acid was obtained as a yellow oil (1.139 g). Analysis of the crude mixture by 1H NMR indicated monoalkylated pentanone **8** (55.5%) and dialkylated pentanone **9** (2.5%), bicyclo[3.2.0]heptan-1-ol **10** (3%), bicyclo[3.2.0]heptan-1-ol **11** (2.5%), and substituted bicyclo[3.2.0]heptan-1-ol **12** (1.5%), were present. The crude mixture was purified by silica column chromatography (hexane: ethyl acetate, 60:40). A total product mass of 1.021g was obtained in the following fractions. The first fraction (62 mg) was bicyclo[3.2.0]heptan-1-ol **10**. The second fraction (514 mg) was monoalkylated pentanone **8**. The third fraction (154 mg) was a mixture of bicyclo[3.2.0]heptan-1-ol **11**, and monoalkylated pentanone **8**. The fourth fraction (245 mg) was monoalkylated pentanone **8**, dialkylated pentanone **9** and substituted bicyclo[3.2.0]heptan-1-ol **12**. Analytically pure samples were obtained by semi-preparative HPLC of bicyclo[3.2.0]heptan-1-ol **10** from fraction one (hexane:ethyl acetate, 60:40), bicyclo[3.2.0]heptan-1-ol **11** from fraction three (hexane:ethylacetate, 70:30), monoalkylated pentanone **8** from fraction four (hexane:ethyl acetate, 60:40), dialkylated pentanone **9** from fraction four (hexane:ethyl acetate, 60:40) and substituted bicyclo[3.2.0]heptan-1-ol **12** from fraction four (hexane: ethyl acetate, 60:40).

Method B (5 min, dark, 0.155M)

Cyclopentanone (0.2 ml, 2.261 mmole), lithium diisopropyl amine (1.27 M, 1.78 ml, 2.261 mmole) and phenyl vinyl sulfoxide (0.3 ml, 2.261 mmole) in THF (12.3 ml), were reacted together using method B. Upon workup, the crude sulfoxide mixture (0.372 g, 1.574 mmole) in chloroform (10 ml), was treated with MCPBA (1.574 mmole) in chloroform (15 ml). Upon workup, the crude sulfone mixture containing *m*-chlorobenzoic acid was obtained as a yellow oil (0.303 g). Analysis of the crude mixture by 1H NMR indicated phenyl vinyl sulfoxide (6%), monoalkylated pentanone **8** (19.5%) and dialkylated pentanone **9** (0.5%), bicyclo[3.2.0]heptan-1-ol **10** (18.5%), bicyclo[3.2.0]heptan-1-ol **11** (0.5%), and substituted bicyclo[3.2.0]heptan-1-ol **12** (0.5%) were present.

Method C (5 min, dark, 0.010M )

Cyclopentanone (0.1 ml, 1.131 mmole), lithium diisopropyl amine (1.70 M, 0.67 ml, 1.131 mmole) and phenyl vinyl sulfoxide (0.15 ml, 1.131 mmole) in THF (113 ml), were reacted together using method C. Upon workup, the crude sulfoxide mixture (0.278 g, 1.176 mmole) in chloroform (10 ml), was treated with MCPBA (0.176 mmole) in chloroform (15 ml). Upon workup, the crude sulfone mixture was obtained as a yellow oil (0.220 g). Analysis of the crude mixture by 1H NMR indicated phenyl vinyl sulfoxide (23%), phenyl vinyl sulfone (3.5%), monoalkylated pentanone **8** (22%), bicyclo[3.2.0]heptan-1-ol **10** (26.5%), bicyclo[3.2.0]heptan-1-ol **11** (1%), and substituted bicyclo[3.2.0]heptan-1-ol **12** (0.5%) were present.

Method D (5 min, dark, 0.307M)

Cyclopentanone (0.5 ml, 5.653 mmole), lithium diisopropyl amine (1.95 M, 2.9 ml, 5.653 mmole) and phenyl vinyl sulfoxide (0.76 ml, 5.653 mmole) in THF (14.2 ml), were reacted together using method D. Upon workup, the crude sulfoxide mixture (1.149 g, 4.862 mmole) in chloroform (20 ml), was treated with MCPBA (4.862 mmole) in chloroform (30 ml). Upon workup, the crude sulfone mixture containing minor amounts of *m*-chlorobenzoic acid was obtained as a yellow oil (0.873 g). Analysis of the crude mixture by 1H NMR indicated phenyl vinyl sulfoxide (6.5%), monoalkylated pentanone **8** (25.5%), bicyclo[3.2.0]heptan-1-ol **10** (22.5%), bicyclo[3.2.0]heptan-1-ol **11** (1%), and substituted bicyclo[3.2.0]heptan-1-ol **12** (1%) were present.

Reaction of Cycloheptanone

Method A (45 min, laboratory light, 0.157 M )

Cycloheptanone (0.5 ml, 4.239 mmole), lithium diisopropyl amine (1.40 M, 3.0 ml, 4.239 mmole) and phenyl vinyl sulfoxide (0.57 ml, 4.239 mmole) in THF (23 ml), were reacted together using method A. Upon workup, the crude sulfoxide mixture (1.074 g, 4.063 mmole) in chloroform (20 ml), was treated with MCPBA (4.063 mmole) in chloroform (30 ml). Upon workup, the crude sulfone mixture was obtained as a yellow oil (0.890 g). Analysis of the crude mixture by 1H NMR indicated that monoalkylated cycloheptanone **15** (41%), bicyclo[5.2.0]nonan-1-ol **16** (26%), and bicyclo[5.2.0]nonan-1-ol **17** (8%) were present. The crude mixture was purified by silica column chromatography (hexane: ethyl acetate, 60:40). The first fraction (257 mg) was bicyclo[5.2.0]nonan-1-ol **16**. The second fraction (170 mg) was monoalkylated cycloheptanone **15** which included bicyclo[5.2.0]nonan-1-ol **16** (<5%). The third fraction (240 mg) was a mixture of bicyclo[5.2.0]nonan-1-ol **17** and monoalkylated cycloheptanone **15**, and the last fraction (71 mg) was monoalkylated cycloheptanone **15**. Analytically pure samples were obtained by semi-preparative HPLC of bicyclo[5.2.0]nonan-1-ol **16**, from fraction one (hexane: ethyl acetate, 70:30), and of bicyclo[5.2.0]nonan-1-ol **17** from fraction three (hexane:ethyl acetate 60:40), monoalkylated cycloheptanone **15** from fraction three (hexane:ethyl acetate 60:40).

Method B (5 min, dark, 0.160M)

Cycloheptanone (0.530 ml, 4.458 mmole), lithium diisopropyl amine (1.74 M, 2.56 ml, 4.458 mmole) and phenyl vinyl sulfoxide (0.6 ml, 4.458 mmole) in THF (25ml), were reacted together using method B. Upon workup, the crude sulfoxide mixture (1.063 g, 4.021 mmole) in chloroform (20 ml), was treated with MCPBA (4.021 mmole) in chloroform (30 ml). Upon workup, the crude sulfone mixture containing minor amounts of *m*-chlorobenzoic acid was obtained as a yellow oil (1.043 g). Analysis of the crude mixture by 1H NMR indicated that phenyl vinyl sulfoxide (4%), phenyl vinyl sulfone (1%), monoalkylated cycloheptanone **15** (3%), bicyclo[5.2.0]nonan-1-ol **16** (61.5%), bicyclo[5.2.0]nonan-1-ol **17** (8.5%) and substituted bicyclo[5.2.0]nonan-1-ol **18** (1%) were present. The crude mixture was purified by silica column chromatography (hexane: ethyl acetate, 60:40). The first fraction (653 mg) was bicyclo[5.2.0]nonan-1-ol **16**, which included phenyl vinyl sulfoxide (< 5%). The second fraction (20 mg) was monoalkylated cycloheptanone **15**, bicyclo[5.2.0]nonan-1-ol **17**, bicyclo[5.2.0]nonan-1-ol **16** (<5%) and phenyl vinyl sulfoxide. The third fraction (87 mg) was bicyclo[5.2.0]nonan-1-ol **17**. The fourth fraction (46 mg) was substituted bicyclo[5.2.0]nonan-1-ol **18** and phenyl vinyl sulfone (<5%). An analytically pure sample of substituted bicyclo[5.2.0]nonan-1-ol **16** was obtained by semi-preparative HPLC from fraction four (hexane: ethyl acetate, 70:30).

Method C (5 min, dark, 0.010M)

Cycloheptanone (0.1 ml, 0.848 mmole), lithium diisopropyl amine (1.70 M, 0.5 ml, 0.848 mmole) and phenyl vinyl sulfoxide (0.11 ml, 0.848 mmole) in THF (85ml), were reacted together using method C. Upon workup, the crude sulfoxide mixture (0.222 g, 0.840 mmole) in chloroform (10 ml), was treated with MCPBA (0.840 mmole) in chloroform (15 ml). Upon workup, the crude sulfone mixture containing *m*-chlorobenzoic acid was obtained as a yellow oil (0.158 g). Analysis of the crude mixture by 1H NMR indicated that phenyl vinyl sulfoxide (13.5%), monoalkylated cycloheptanone **15** (6%), bicyclo[5.2.0]nonan-1-ol **16** (42%), and bicyclo[5.2.0]nonan-1-ol **17** (5%) were present.

Method D (5 min, dark, 0.306M)

Cycloheptanone (0.5 ml, 4.239 mmole), lithium diisopropyl amine (1.95 M, 2.2 ml, 4.239 mmole) and phenyl vinyl sulfoxide (0.56 ml, 4.239 mmole) in THF (10.6ml), were reacted together using method D. Upon workup, the crude sulfoxide mixture (1.211 g, 4.598 mmole) in chloroform (20 ml), was treated with MCPBA (4.598 mmole) in chloroform (30 ml). Upon workup, the crude sulfone mixture containing a trace of *m*-chlorobenzoic acid was obtained as a yellow oil (0.920 g). Analysis of the crude mixture by 1H NMR indicated that phenyl vinyl sulfoxide (12%), monoalkylated cycloheptanone **15** (9%), bicyclo[5.2.0]nonan-1-ol **16** (43.5%), and bicyclo[5.2.0]nonan-1-ol **17** (12%) were present.

Reaction of Cyclooctanone

Method A (45 min, laboratory light, 0.155M)

Cyclooctanone (0.5 ml, 3.796 mmole) in THF (2 ml), lithium diisopropyl amine (1.95 M, 1.95 ml, 3.796 mmole) and phenyl vinyl sulfoxide (0.51 ml, 3.796 mmole) in THF (19.5 ml), were reacted together using method A. Upon workup, the crude sulfoxide mixture (1.128 g, 4.051 mmole) in chloroform (20 ml), was treated with MCPBA (4.051 mmole) in chloroform (30 ml). Upon workup, the crude sulfone mixture containing minor amounts of *m*-chlorobenzoic acid was obtained as a yellow oil (1.021 g). Analysis of the crude mixture by 1H NMR indicated that monoalkylated cyclooctanone **19** (65%), dialkylated cyclooctanone **20** (14.5%) and bicyclo[6.2.0]decan-1-ol **21** (2%) were present. The crude mixture was purified by silica column chromatography (hexane: ethyl acetate, 60:40). The first fraction (20 mg) was bicyclo[6.2.0]decan-1-ol **21**. The second fraction (502 mg) was monoalkylated cyclooctanone **19**. The last fraction (317 mg) was dialkylated cyclooctanone **20**. Analytically pure samples were obtained by semi-preparative HPLC of bicyclo[6.2.0]decan-1-ol **21** from fraction one (hexane: ethyl acetate, 70:30), monoalkylated cyclooctanone **19** from fraction two (hexane: ethyl acetate, 60:40) and dialkylated cyclooctanone **20** from fraction three (hexane: ethyl acetate, 70:30)

Method B (5 min, dark, 0.155M)

Cyclooctanone (0.5 ml, 3.796 mmole) in THF (2 ml), lithium diisopropyl amine (1.95 M, 1.95 ml, 3.796 mmole) and phenyl vinyl sulfoxide (0.51 ml, 3.796 mmole) in THF (19.5 ml), were reacted together using method B. Upon workup, (1.033 g, 3.710 mmole) in chloroform (20 ml), was treated with MCPBA (3.710 mmole) in chloroform (30 ml). Upon workup, the crude sulfone mixture containing minor amounts of *m*-chlorobenzoic acid was obtained as a yellow oil (0.933 g). Analysis of the crude mixture by 1H NMR indicated that monoalkylated cyclooctanone **19** (49.5%), dialkylated cyclooctanone **20** (9%), bicyclo[6.2.0]decan-1-ol **21** (19%), and bicyclo[6.2.0]decan-1-ol **22** (3.5%) were present. The crude mixture was purified by silica column chromatography (hexane: ethyl acetate, 60:40). The first fraction (182 mg) was bicyclo[6.2.0]decan-1-ol **21**. The second fraction (319 mg) was a mixture of bicyclo[6.2.0]decan-1-ol **22** and monoalkylated cyclooctanone **19**. The third fraction (14 mg) was a mixture of monoalkylated cyclooctanone **19** and dialkylated cyclooctanone **20**. The fourth fraction (179 mg) was dialkylated cyclooctanone **20**. An analytically pure sample of bicyclo[6.2.0]decan-1-ol **22** was obtained by semi-preparative HPLC using (hexane: ethyl acetate, 75:25).

Method C (5 min, dark, 0.010M)

Cyclooctanone (0.1 ml, 0.759 mmole) in THF (2 ml), lithium diisopropyl amine (1.70 M, 0.45 ml, 0.759 mmole) and phenyl vinyl sulfoxide (0.1 ml, 0.759 mmole) in THF (76 ml), were reacted together using method C. Upon workup, the crude sulfoxide mixture (0.225 g, 0.808 mmole) in chloroform (10 ml), was treated with MCPBA (0.808 mmole) in chloroform (15 ml). Upon workup, the crude sulfone mixture was obtained as a yellow oil (0.164 g). Analysis of the crude mixture by 1H NMR indicated that phenyl vinyl sulfoxide (21%), monoalkylated cyclooctanone **19** (44%), dialkylated cyclooctanone **20** (2%) and bicyclo[6.2.0]decan-1-ol **21** (6%) were present.

Method D (5 min, dark, 0.310M)

Cyclooctanone (0.5 ml, 3.796 mmole) in THF (2 ml), lithium diisopropyl amine (1.95 M, 1.95 ml, 3.796 mmole) and phenyl vinyl sulfoxide (0.51 ml, 3.796 mmole) in THF (7.3 ml), were reacted together using method D. Upon workup, the crude sulfoxide mixture (1.088 g, 3.908 mmole) in chloroform (20 ml), was treated with MCPBA (3.908 mmole) in chloroform (30 ml). Upon workup, the crude sulfone mixture containing traces of *m*-chlorobenzoic acid was obtained as a yellow oil (0.940 g). Analysis of the crude mixture by 1H NMR indicated that phenyl vinyl sulfoxide (0.5%), monoalkylated cyclooctanone **19** (47%), dialkylated cyclooctanone **20** (7%), bicyclo[6.2.0]decan-1-ol **21** (23%), and bicyclo[6.2.0]decan-1-ol **22** (6%) were present.
